# Supplementary material
Source: publisher site journal article supplement (https://static.cambridge.org/content/id/urn:cambridge.org:id:article:S0022112015001986/resource/name/FLM1500198supp.zip)
Supplement: Supplementary file 1 [file FLM1500198supp.zip › FLM1500198_Supplementary Material.pdf]

## Appendix A. Supplementary Material

### A.1. Calculation of $f^{(0)}$

We seek the solution to

$$\frac{\partial}{\partial \theta} \left( yPe(1 - \beta \cos 2\theta)f^{(0)} - \frac{\partial f^{(0)}}{\partial \theta} \right) + \sigma(f^{(0)} - \frac{1}{2\pi}) = 0, \quad (\text{A } 1)$$

with normalisation condition

$$\int_0^{2\pi} f^{(0)}(\theta; y) d\theta = 1. \quad (\text{A } 2)$$

As we require periodicity  $f^{(0)}(\theta; y) = f^{(0)}((2\pi + \theta); y)$ , we can seek a solution as a Fourier Series:

$$f = \frac{1}{2\pi} \left( \frac{a_0}{2} + \sum_1^{\infty} a_k \cos k\theta + b_k \sin k\theta \right),$$

where the  $a_k$  and  $b_k$  for  $k > 0$  will be functions of  $y$ , and  $a_0 = 2$  to ensure the normalisation condition is satisfied.

On inserting this expression into equation (A 1), we obtain

$$\begin{aligned} & yPe \sum_1^{\infty} -ka_k \sin k\theta + kb_k \cos k\theta \\ & + yPe \frac{\beta}{2} \left( a_1 \sin \theta + b_1 \cos \theta + \sum_1^{\infty} k(a_{k+2} + a_{k-2}) \sin k\theta - \sum_1^{\infty} k(b_{k+2} + b_{k-2}) \cos k\theta \right) \\ & + \sum_1^{\infty} (k^2 + \sigma) (a_k \cos k\theta + b_k \sin k\theta) = 0, \end{aligned} \quad (\text{A } 3)$$

where  $a_k = 0$  for  $k < 0$  and  $b_k = 0$  for  $k < 1$ . By the orthogonality of the Fourier modes, on truncating the expansion to a finite sum, we can obtain solutions for the coefficients for specified values of the parameters  $yPe$ ,  $\beta$  and  $\sigma$ . In particular we notice that the odd and even in  $k$  modes are uncoupled, and thus find that all odd modes are equal to zero.

### A.2. $Pe \ll 1$ asymptotics

For  $Pe \ll 1$  we can obtain an approximate analytic expression for  $f^{(0)}$ . Specifically we expand in powers of  $Pe$  to obtain a solution correct to  $O(Pe^2)$ :

$$f^{(0)} = \frac{1}{2\pi} \left( f^{(00)} + Pe f^{(01)} + Pe^2 f^{(02)} \right). \quad (\text{A } 4)$$

with integral constraint  $\int_0^{2\pi} f^{(00)} d\theta = 2\pi$ ,  $\int_0^{2\pi} f^{(01)} d\theta = 0$ ,  $\int_0^{2\pi} f^{(02)} d\theta = 0$ . Substituting into equation (A 1) we obtain at  $O(1)$ :

$$-\frac{\partial^2}{\partial \theta^2} f^{(00)} + \sigma(f^{(00)} - \frac{1}{2\pi}) = 0, \quad (\text{A } 5)$$

which has solution  $f^{(00)} = 1$ . At  $O(Pe)$  equation (A 1) gives

$$\frac{\partial^2}{\partial \theta^2} f^{(01)} - \sigma f^{(01)} = \frac{\partial}{\partial \theta} (y(1 - \beta \cos 2\theta)) = 2y\beta \sin \theta, \quad (\text{A } 6)$$

which has solution

$$f^{(01)}(\theta; y) = -\frac{\beta y}{2(1 + \sigma/4)} \sin 2\theta \quad (\text{A } 7)$$

At  $O(Pe^2)$  equation (A 1) gives

$$\frac{\partial^2}{\partial \theta^2} f^{(02)} - \sigma f^{(02)} = \frac{\partial}{\partial \theta} \left( y(1 - \beta \cos 2\theta) f^{(01)} \right) = \frac{\beta y^2}{1 + \sigma/4} (\beta \cos 4\theta - \cos 2\theta) \quad (\text{A } 8)$$

which has solution

$$f^{(02)}(\theta; y) = \frac{\beta y^2 Pe^2}{4(1 + \sigma/4)} \left( \frac{\cos 2\theta}{1 + \sigma/4} - \frac{\beta \cos 4\theta}{4 + \sigma/4} \right). \quad (\text{A } 9)$$

The mean squared vertical swimming speed can then be computed to  $O(Pe^2)$ :

$$\begin{aligned} V_{MS}(y) &= \int_0^{2\pi} \sin^2 \theta f^{(0)} d\theta = \frac{1}{2\pi} \int \sin^2 \theta \left( f^{(00)} + Pe f^{(01)} + Pe^2 f^{(02)} \right) d\theta \\ &= \frac{1}{2} \left( 1 - \frac{\beta y^2 Pe^2}{8(1 + \sigma/4)^2} \right). \end{aligned} \quad (\text{A } 10)$$

### A.3. Presence of Eigenfunctions

Consider the governing equation for  $\psi$  when  $Pe = 0$  and  $d = 0$ :

$$\epsilon \sin \theta \frac{\partial \psi}{\partial y} - \frac{\partial^2 \psi}{\partial \theta^2} + (\sigma - \epsilon \chi \sin \theta) \psi - \frac{1}{2\pi} \int_0^{2\pi} (\sigma - \epsilon \chi \sin \theta') \psi(y, \theta') d\theta' = 0. \quad (\text{A } 11)$$

On applying the conditions  $\int_0^{2\pi} \psi(y, \theta) d\theta = n(y)$ ,  $\int_0^{2\pi} \psi(y, \theta) \sin \theta d\theta = 0$ , the governing equation simplifies to

$$\epsilon \sin \theta \frac{\partial \psi}{\partial y} - \frac{\partial^2 \psi}{\partial \theta^2} + (\sigma - \epsilon \chi \sin \theta) \psi - \frac{1}{2\pi} \sigma n(y) = 0. \quad (\text{A } 12)$$

As we require a solution periodic in  $\theta$ , we seek a Fourier Series expansion:

$$\psi = \frac{e^{\chi y}}{2\pi} \left( \frac{a_0(y)}{2} + \sum_1^\infty a_k(y) \cos k\theta + b_k(y) \sin k\theta \right).$$

The condition  $\int_0^{2\pi} \psi(y, \theta) \sin \theta d\theta = 0$  gives  $b_1 = 0$ . The symmetry condition  $\psi(y, \theta; Pe) = \psi(y, \pi - \theta; -Pe)$  gives  $a_{k+1} = b_k = 0$  for  $k$  even. The symmetry condition  $\psi(y, \theta; \chi) = \psi(-y, -\theta; -\chi)$  gives  $a_k(y)$  is an even function of  $y$  and  $b_k(y)$  is an odd function of  $y$ . We thus rewrite the solution as

$$\psi = \frac{e^{\chi y}}{2\pi} \left( \frac{P_0(y)}{2} + \sum_1^\infty P_k(y) \cos 2k\theta + Q_k(y) \sin(2k+1)\theta \right),$$

where  $P_k(y)$  is an even function of  $y$  and  $Q_k(y)$  is an odd function of  $y$ . By orthogonality of the eigenmodes, we obtain the following relations between the Fourier coefficients:

$$P'_k - P'_{k+1} + \frac{2((2k+1)^2 + \sigma)}{\epsilon} Q_k = 0, \quad (\text{A } 13)$$

$$Q'_k - Q'_{k+1} + \frac{2((2k)^2 + \sigma)}{\epsilon} P_k = 0. \quad (\text{A } 14)$$

Setting  $k = 0$  in equation (A 16) gives

$$P_0 = 1 - \int_{-1}^1 P_1(y) dy + P_1(y). \quad (\text{A } 15)$$

If  $P_1$  contains eigenfunction solutions,  $P_0$  and hence the cell concentration will not be

uniquely determined. If we truncate the system at  $N = 1$  we have

$$P_1' + \frac{2(9 + \sigma)}{\epsilon} Q_1 = 0, \quad (\text{A } 16)$$

$$Q_1' + \frac{2(4 + \sigma)}{\epsilon} P_1 = 0, \quad (\text{A } 17)$$

which has solution

$$\begin{pmatrix} P_1 \\ Q_1 \end{pmatrix} = C_1 \mathbf{e}_+ e^{\frac{2}{\epsilon} \lambda y} + C_2 \mathbf{e}_- e^{-\frac{2}{\epsilon} \lambda y} \quad (\text{A } 18)$$

where

$$\mathbf{e}_{\pm} = \begin{pmatrix} 1, \pm \sqrt{\frac{\sigma + 4}{\sigma + 9}} \end{pmatrix}^T, \quad \lambda = \sqrt{(\sigma + 4)(\sigma + 9)}. \quad (\text{A } 19)$$

The symmetry condition that  $P_k(y)$  is an even function of  $y$  and  $Q_k(y)$  is an odd function of  $y$  requires  $C_1 = C_2$ .

In general, there are many eigenmode solutions of the form

$$P_k = \alpha_k \cosh\left(\frac{2}{\epsilon} \lambda y\right), \quad Q_k = \beta_k \sinh\left(\frac{2}{\epsilon} \lambda y\right), \quad (\text{A } 20)$$

where  $\lambda$  is an eigenvalue,  $\alpha_k$  and  $\beta_k$  are components of the corresponding eigenvector, and both eigenvalues and eigenvectors only depend on  $\sigma$  and the truncation value. However, if we enforce the condition that  $\sin \theta \psi = 0$  on the boundaries, then  $\psi = 0$  on the boundaries and this ensures that all coefficients in the eigenfunctions are zero.

#### A.4. Effect of shape on equilibrium distribution with cross channel chemotactic gradient.

The data corresponding to figure 2 for chemotactic cells is plotted in figure A.1. Similar effects are seen with changes in  $\beta$  and  $Pe$  as for the non-chemotactic case, although the distribution is somewhat dominated by the exponential distribution. We see that non-monotonic centreline depletion with increasing  $Pe$  still occurs at smaller values of  $\beta$ , for example  $\beta = 0.2, 0.4$ , as shown in figure A.1f.

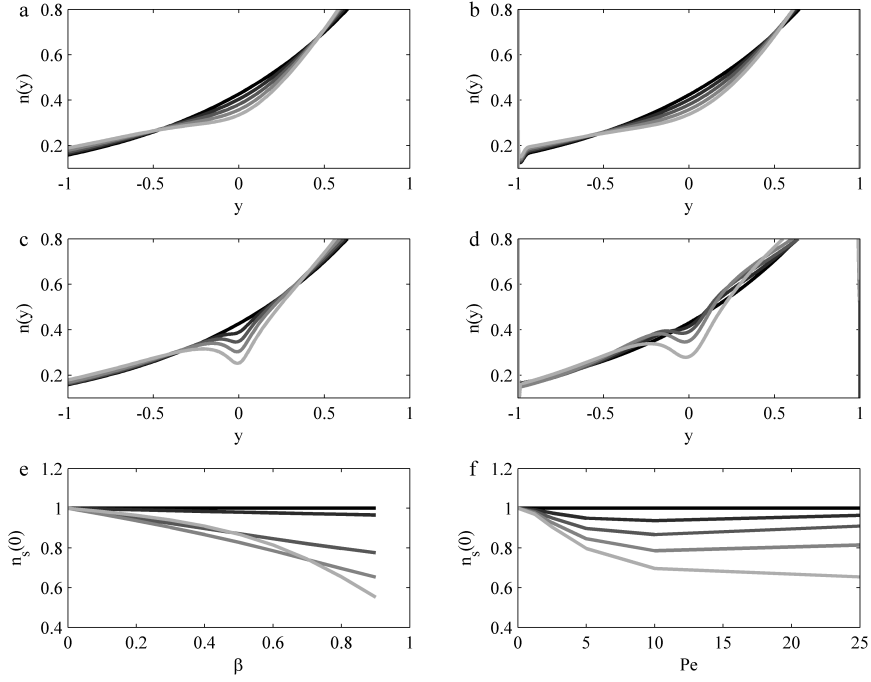

FIGURE A.1. The influence of cell shape,  $\beta$ , on equilibrium cell concentration with  $\chi = 0.99, \sigma = 2$ . (a,b) correspond to  $Pe = 5$  and (c,d) to  $Pe = 25$ . (a,c) Leading order in  $\epsilon$  asymptotic approximation, other plots correspond to numerical solution of  $\psi$  equation. In (e,f)  $n_s(0)$  is the cell concentration at  $y = 0$  normalised by the  $\beta = 0$  solution at the corresponding  $Pe$ . In (a-d,f) greyscale indicate  $\beta = [0, 0.2, 0.4, 0.6, 0.8]$  with black corresponding to 0; in (e) greyscale indicate  $Pe = [0, 1.25, 5, 10, 25]$  with black corresponding to 0.
